# Supplementary material for: Cdc48 and Ubx1 participate in a pathway associated with the inner nuclear membrane that governs Asi1 degradation
Source: Oxford University Press journal article supplement (doi:10.1242/jcs.189332), 2016-08-27
Supplement: jcs189332supp.pdf [file jcs189332supp.pdf]

Supplemental Material

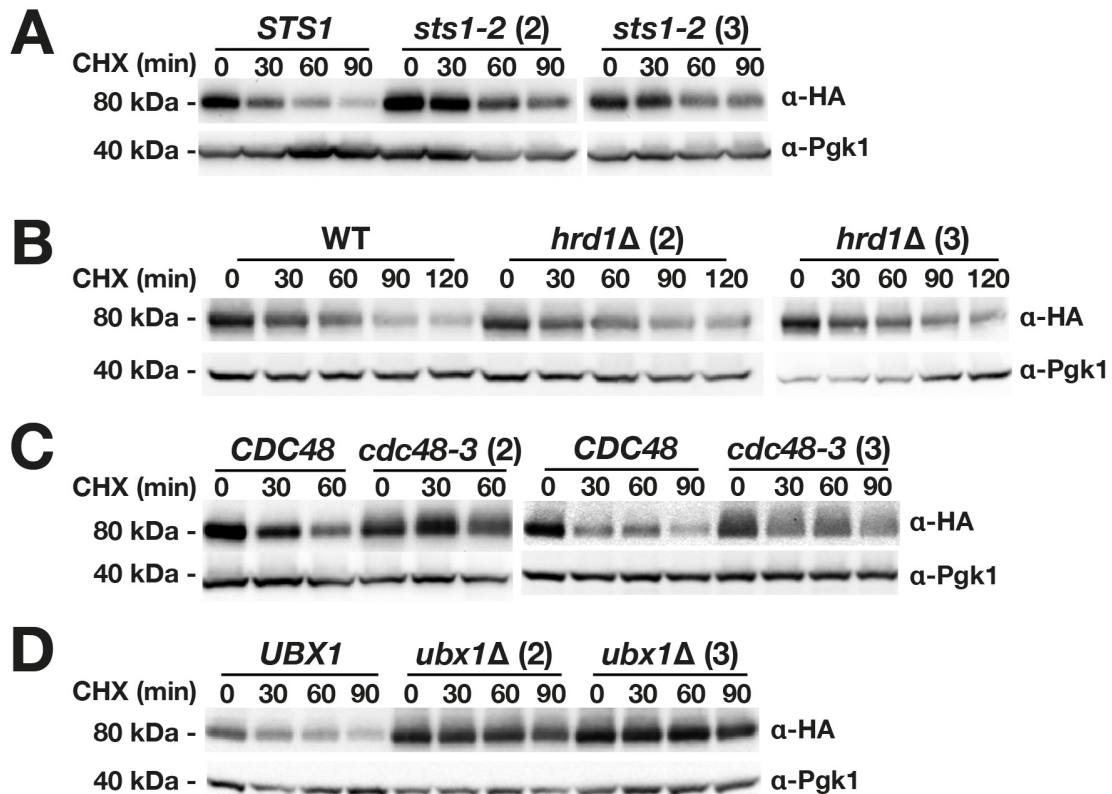

**Figure S1. Replicate immunoblots used to quantitate the dependence of *STS1*, *HRD1*, *CDC48* and *UBX1* on Asi1 stability.** (A) As in Fig. 2D (clone 1) - Asi1 is degraded in an *STS1*-dependent manner by proteasomes in the nucleus. The stability of Asi1 in *STS1* (NA10) and *sts1-2* (NA25) (independent clones 2 and 3) strains expressing Asi1-3HA (pPL1141). Cells were grown at 25 °C (permissive temperature) and shifted to 37 °C (non-permissive temperature) for 3 hours prior to CHX addition. (B) As in Fig. 4A (clone 1) - Asi1 turnover is independent of *HRD1*. CHX chase of Asi1-3HA (pPL1159) in WT (MBY154) and *hrd1Δ* (MBY155) (independent clones 2 and 3). (C) As in Fig. 5B (clone 1) - Asi1 turnover is impaired in *cdc48-3* temperature sensitive cells. CHX chase of Asi1-3HA (pPL1141) in *CDC48* (MHY1562) and *cdc48-3* (MHY3512) cells (independent clones 2 and 3). Cultures were grown at 25 °C (permissive temperature) and shifted to 37 °C (non-permissive temperature) 1 hour prior to CHX addition. (D) As in Fig. 5C (clone 1) - Asi1 turnover is impaired in *ubx1Δ* mutant cells. CHX chase of Asi1-3HA (pPL1141) in *UBX1* (BY4741) and *ubx1Δ* (BY4741<sub>ubx1Δ</sub>) cells (independent clones 2 and 3). Extracts from cells harvested at the indicated times were immunoblotted with anti-HA and anti-Pgk1.

**Table S1. Yeast strains and plasmids used in this study**

| Strain                  | Genotype                                                                      | Reference                      |
|-------------------------|-------------------------------------------------------------------------------|--------------------------------|
| CAY220                  | <i>MATa ura3-52 leu2Δ1 ssd1 cim3-1::RPT6</i>                                  | (Pfirrmann et al., 2010)       |
| MBY150                  | <i>MATa ura3-52 leu2-3,112 lys2Δ201 asi1Δ::kanMX</i>                          | This study                     |
| MBY151                  | <i>MATa ura3-52 leu2-3,112 lys2Δ201 asi1Δ::kanMX ubc6Δ::LEU2</i>              | This study                     |
| MBY152                  | <i>MATa ura3-52 leu2-3,112 lys2Δ201 asi1Δ::kanMX ubc7Δ::LEU2</i>              | This study                     |
| MBY153                  | <i>MATa ura3-52 leu2-3,112 lys2Δ201 asi1Δ::kanMX ubc6Δ::LEU2 ubc7Δ::natMX</i> | This study                     |
| MBY154                  | <i>MATa ura3-52 lys2Δ201 asi1Δ::kanMX</i>                                     | This study                     |
| MBY155                  | <i>MATa ura3-52 lys2Δ201 asi1Δ::kanMX hrd1Δ::URA3</i>                         | This study                     |
| MBY156                  | <i>MATa ura3-52 lys2Δ201 asi1Δ::kanMX doa10Δ::natMX</i>                       | This study                     |
| MBY157                  | <i>MATa ura3-52 lys2Δ201 asi1Δ::kanMX doa10Δ::natMX hrd1Δ::URA3</i>           | This study                     |
| PLY123                  | <i>MATa ura3-52 leu2-3,112 lys2Δ201</i>                                       | Ljungdahl lab                  |
| PLY127                  | <i>MATa ura3-52 lys2Δ201</i>                                                  | Ljungdahl lab                  |
| PLY1314                 | <i>MATa ura3-52 asi1Δ::hphMX</i>                                              | (Boban et al., 2006)           |
| PLY1321                 | <i>MATa ura3-52 asi1Δ::hphMX asi3Δ::kanMX</i>                                 | (Zargari et al., 2007)         |
| PLY1327                 | <i>MATa ura3-52 lys2Δ201 asi1Δ::hphMX</i>                                     | Ljungdahl lab                  |
| PLY1343                 | <i>MATa ura3-52 asi1Δ::hphMX asi2Δ::hisG</i>                                  | (Zargari et al., 2007)         |
| PLY1346                 | <i>MATa ura3-52 asi1Δ::hphMX asi2Δ::hisG asi3Δ::kanMX</i>                     | (Zargari et al., 2007)         |
| PLY1348                 | <i>MATa ura3-52 leu2Δ1 ssd1 cim3-1</i>                                        | (Pfirrmann et al., 2010)       |
| PLY1581                 | <i>MATa ura3-52 trp1Δ101::loxP ASI3-6HA::Kl-TRP1</i>                          | Zargari et al., 2007)          |
| PLY1630                 | <i>MATa ura3-52 asi1Δ::hphMX ssy5Δ::natMX,</i>                                | (Zargari et al., 2007)         |
| PLY1811                 | <i>MATa ura3-52 lys2Δ201 ASI1-6HA::hphNT1</i>                                 | This study                     |
| PLY1947                 | <i>MATa ura3-52 asi1Δ::hphMX asi2Δ::hisG asi3Δ::kanMX doa10Δ::natMX</i>       | This study                     |
| YAZ101                  | <i>MATa ura3-52 lys2Δ201 asi1Δ::hphMX pep4Δ</i>                               | Ljungdahl lab                  |
| BY4741                  | <i>MATa his3Δ1 leu2Δ0 lys2Δ0 ura3Δ0</i>                                       | M. Hochstrasser                |
| BY4741 <sub>ubc7Δ</sub> | <i>MATa his3Δ1 leu2Δ0 lys2Δ0 ura3Δ0 ubc7Δ</i>                                 | M. Hochstrasser                |
| BY4741 <sub>cue1Δ</sub> | <i>MATa his3Δ1 leu2Δ0 lys2Δ0 ura3Δ0 cue1Δ</i>                                 | M. Hochstrasser                |
| BY4741 <sub>ubx1Δ</sub> | <i>MATa his3Δ1 leu2Δ0 lys2Δ0 ura3Δ0 ubx1Δ</i>                                 | M. Hochstrasser                |
| MHY1562                 | <i>MATa his3Δ200 leu2-3,112 ura3-52 trp1 ade2-1</i>                           | (Ravid and Hochstrasser, 2007) |
| MHY3512                 | <i>MATa his3Δ200 leu2-3,112 ura3-52 trp1 ade2-1 cdc48-3</i>                   | (Ravid and Hochstrasser,       |

| Strain  | Genotype                                                                                                  | Reference                    |
|---------|-----------------------------------------------------------------------------------------------------------|------------------------------|
| NA10    | <i>MATa ura3-1 trp1-1 ade2-1 leu2-3, 112 his3-11 (STS1)</i>                                               | 2007)<br>(Chen et al., 2011) |
| NA25    | <i>MATa ura3-1 trp1-1 ade2-1 leu2-3, 112 his3-11 sts1-2</i>                                               | (Chen et al., 2011)          |
| Plasmid | Description                                                                                               | References                   |
| pAZ013  | pRS202 (2 $\mu$ <i>URA3</i> ) containing <i>AS11</i>                                                      | Ljungdahl lab                |
| pPL1136 | pRS202 (2 $\mu$ <i>URA3</i> ) containing <i>AS11-3HA</i>                                                  | (Zargari et al., 2007)       |
| pPL1141 | pRS316 (CEN/ARS <i>URA3</i> ) containing <i>AS11-3HA</i>                                                  | (Zargari et al., 2007)       |
| pPL1142 | pRS316 (CEN/ARS <i>URA3</i> ) containing <i>3HA-AS12</i>                                                  | (Zargari et al., 2007)       |
| pPL1159 | pRS317 (CEN/ARS <i>LYS2</i> ) containing <i>AS11-3HA</i>                                                  | Ljungdahl lab                |
| pPL1307 | YEpl95-based (2 $\mu$ <i>URA3</i> replaced with <i>LYS2</i> ) containing <i>P<sub>CUP1</sub>-6HIS-UBI</i> | (Omnus et al., 2011)         |
